# Supplementary material for: Enhanced Antibacterial Activity of Novel Fluorescent Glutathione-Capped Ag Nanoclusters
Source: MDPI journal article supplement (doi:10.3390/ijms24098306), 2023-05-05
Supplement: s1 [file s1]

## Synthesis of novel fluorescent glutathione-capped silver nanoclusters with enhanced antibacterial activity

\*Corresponding author: khlebtsov\_b@ibppm.ru (Boris N. Khlebtsov).

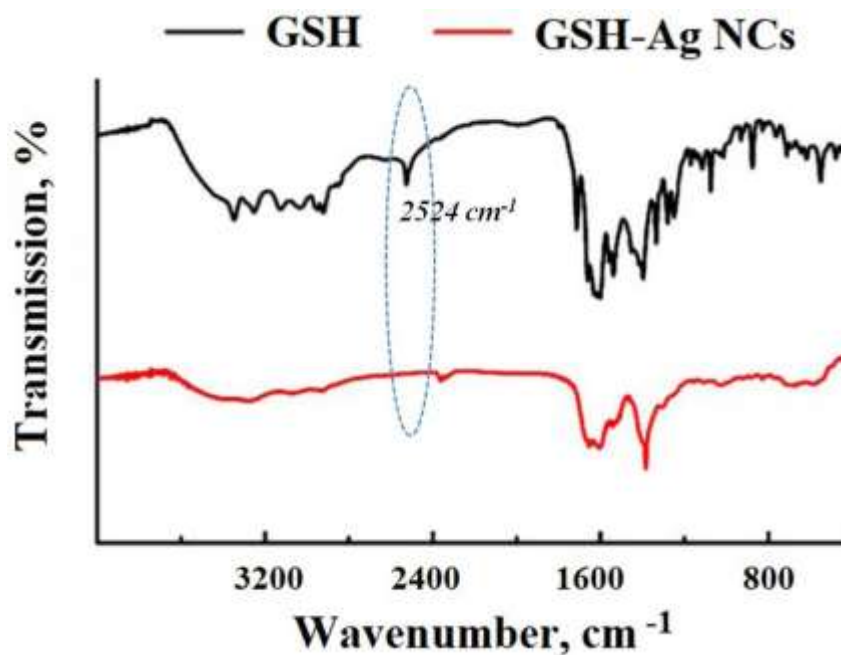

**Figure S1.** FTIR spectra of GSH and GSH-Ag NCs. The S–H stretching vibration at 2524 cm<sup>-1</sup> in free GSH is absent in the GSH-Ag NCs. GSH features in the region 2000–400 cm<sup>-1</sup> confirm the presence of GSH protection of the nanocluster.

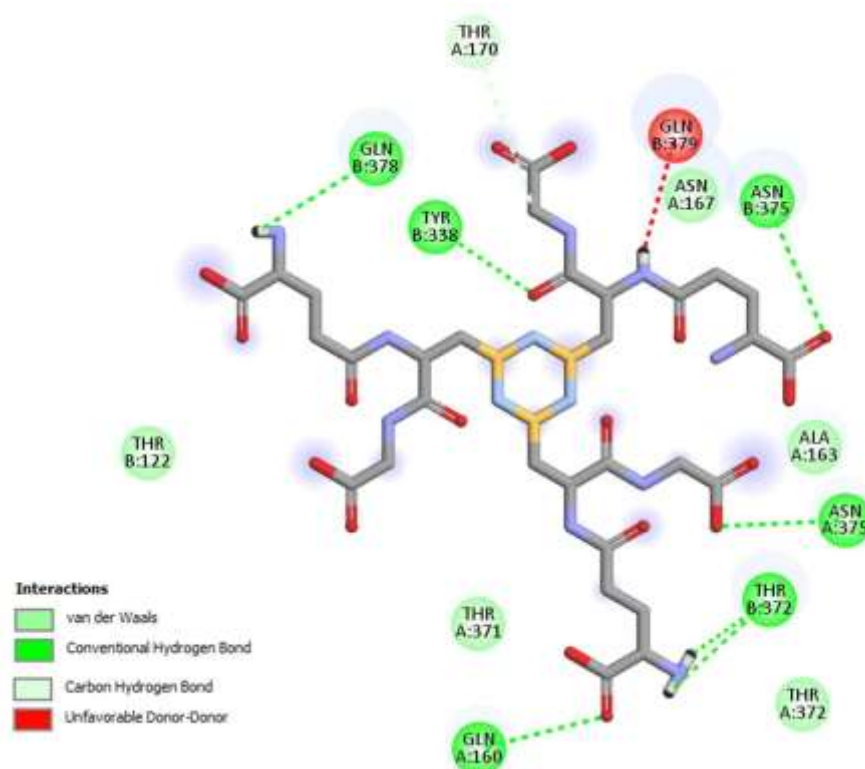

**Figure S2.** 2D interactions of Ag-SG NCs with amino acid residues of the conserved entrance aperture of TolC.

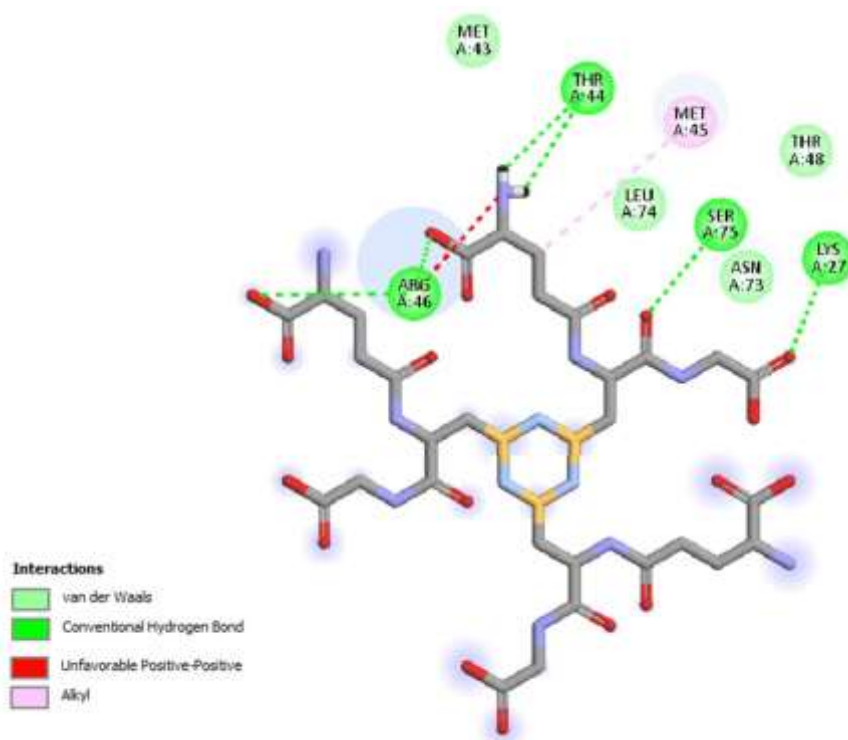

**Figure S3.** 2D interactions of Ag-SG NCs within the active site of cation efflux system protein CusF.

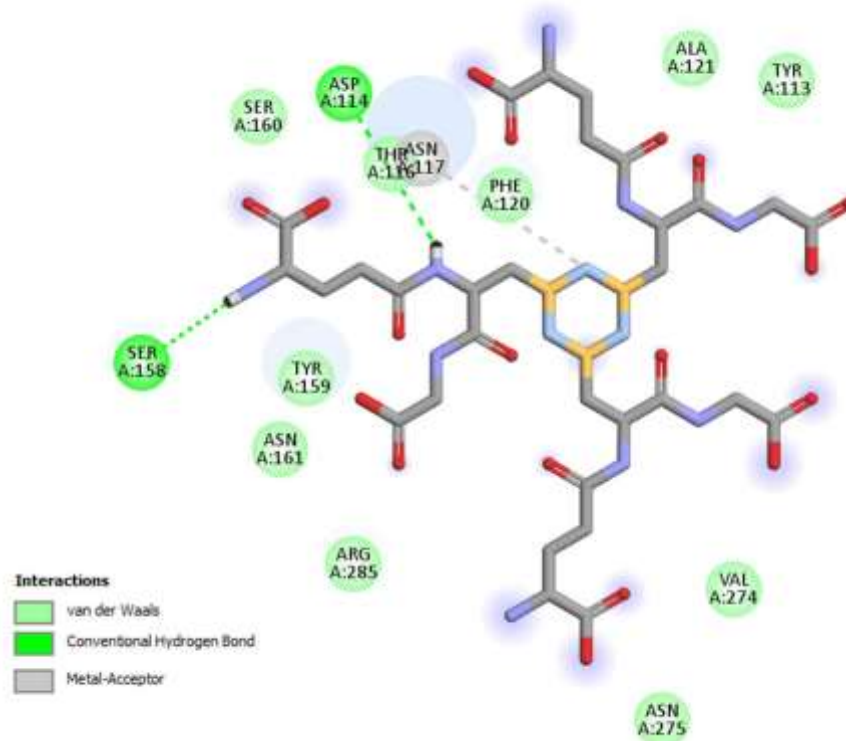

**Figure S4.** 2D interactions of Ag-SG NCs within the active site of D-alanyl-D-alanine carboxypeptidase.
